# Supplementary material for: The ER protein Creld regulates ER-mitochondria contact dynamics and respiratory complex 1 activity
Source: Research Square preprint supplement (doi:10.21203/rs.3.rs-911428/v1), 2021-09-24
Supplement: Supplementary file 1 [file bf5c7ed4ff20ff118c1cf848.pdf]

## Supplement

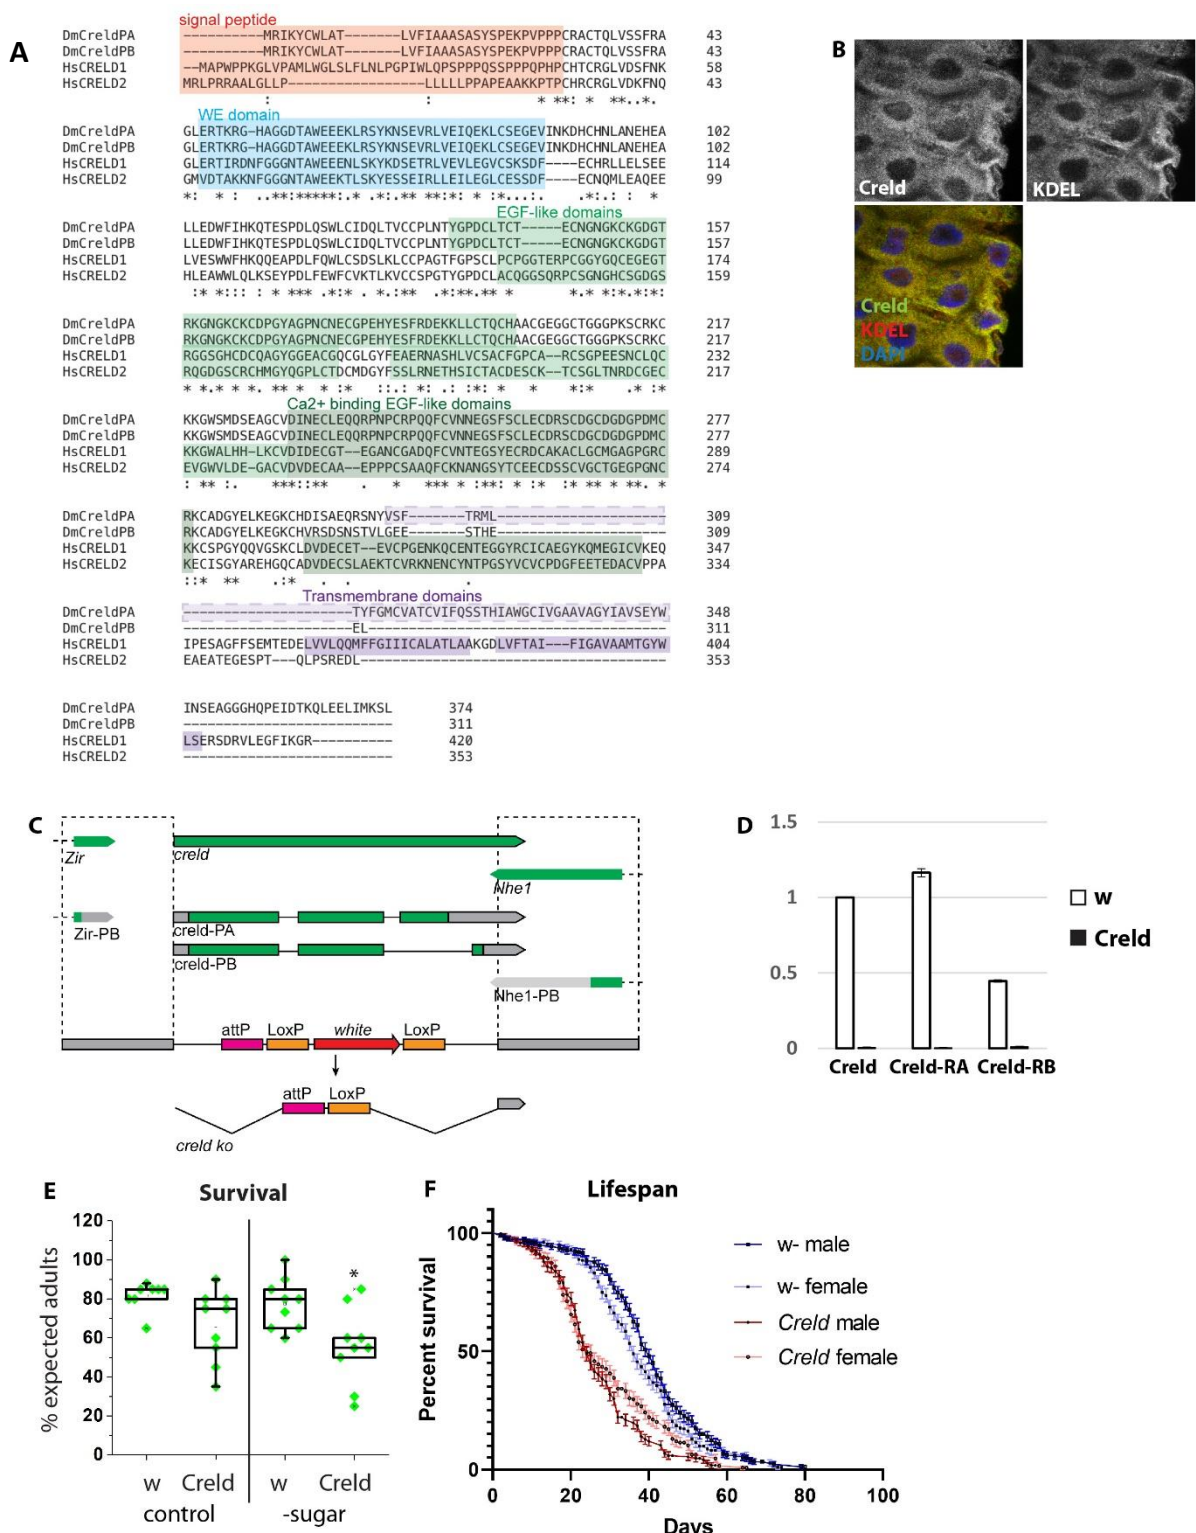

**Figure S1:** A) Representation of the domains and conservation of the *Drosophila* Cred peptides PA and PB and human CRELD1 and 2. B) Cred primarily colocalizes with the ER marker KDEL in *Drosophila* gut tissue. C) Representation of the generation of the *Cred*<sup>Δ51</sup> mutant by homologous recombination. D) Transcript levels determined by real-time qPCR of the *Cred* isoforms RA and RB. E) Survival rate of *Cred* mutants on food containing sugar and protein or sugar-depleted food

compared to w<sup>1118</sup>. F) Lifespan of w<sup>1118</sup> and *Creld* mutant male and female flies. Asterisks represent \*  $p < 0.05$

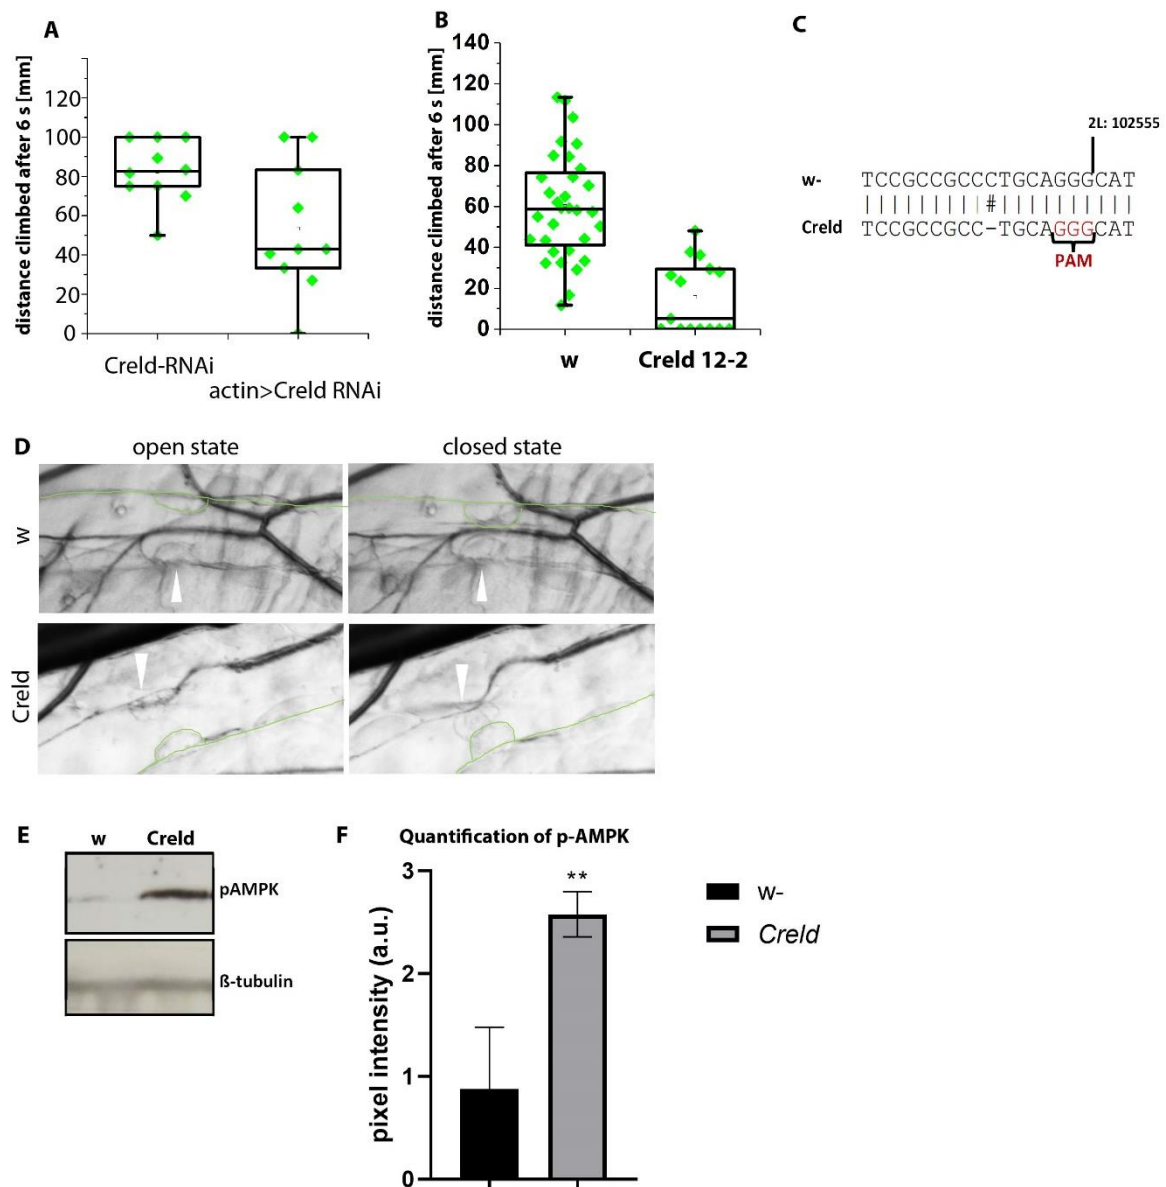

**Figure S2:** A) SING assay of flies expressing 2 copies of *Creld* RNAi under the control of the ubiquitous *actin-Gal4* driver. Genotypes are *Creld*-RNAi (KK100565)/+; *Creld*-RNAi (TRiP.GLC0179)/+ and *actin-Gal4/Creld*-RNAi (KK100565); *Creld*-RNAi (TRiP.GLC0179)/+. B) SING assay of w<sup>1118</sup> and *Creld* 12-2 mutants, the latter generated by Crispr/Cas9-mediated non-homologous end-joining. C) Representation of the *Creld* Crispr/Cas9 point mutation. D) Heart-valve ostial cells in the open and closed state of w<sup>1118</sup> and *Creld* mutant 3rd instar larvae. E) Western Blot of protein extracts from adult w<sup>1118</sup> and *Creld* mutants. Detection of phosphorylated AMPK. F) Quantification of the band intensity,  $n = 5$ . Asterisks represent \*\*  $p < 0.01$

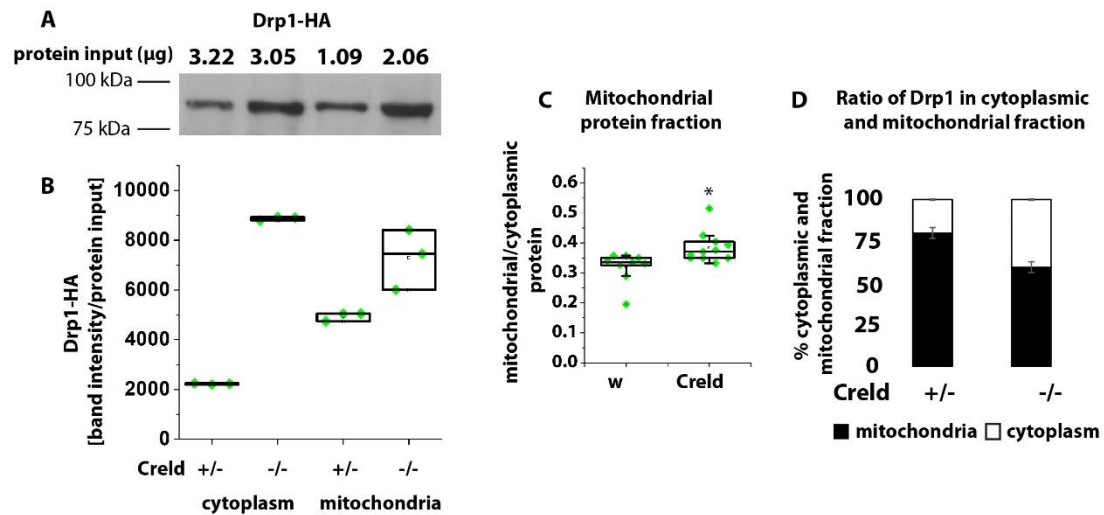

**Figure S3:** A) Western blot of the cytoplasmic and mitochondrial fraction of CrelD<sup>+/-</sup>; tubulin Gal4/UAS Drp1-HA and CrelD<sup>-/-</sup>; tubulin Gal4/UAS Drp1-HA, protein detected with anti-HA. B) Band intensity normalized to the protein input indicated in A). C) Ratio of the protein content of the mitochondrial versus cytoplasmic fraction of adult w<sup>1118</sup> and CrelD mutants. D) Ratio of the normalized band intensity in the cytoplasmic and mitochondrial fraction of Western blot of the cytoplasmic and mitochondrial fraction of CrelD<sup>+/-</sup>; tubulin Gal4/UAS Drp1-HA and CrelD<sup>-/-</sup>; tubulin Gal4/UAS Drp1-HA. Asterisks represent \*p < 0.05.



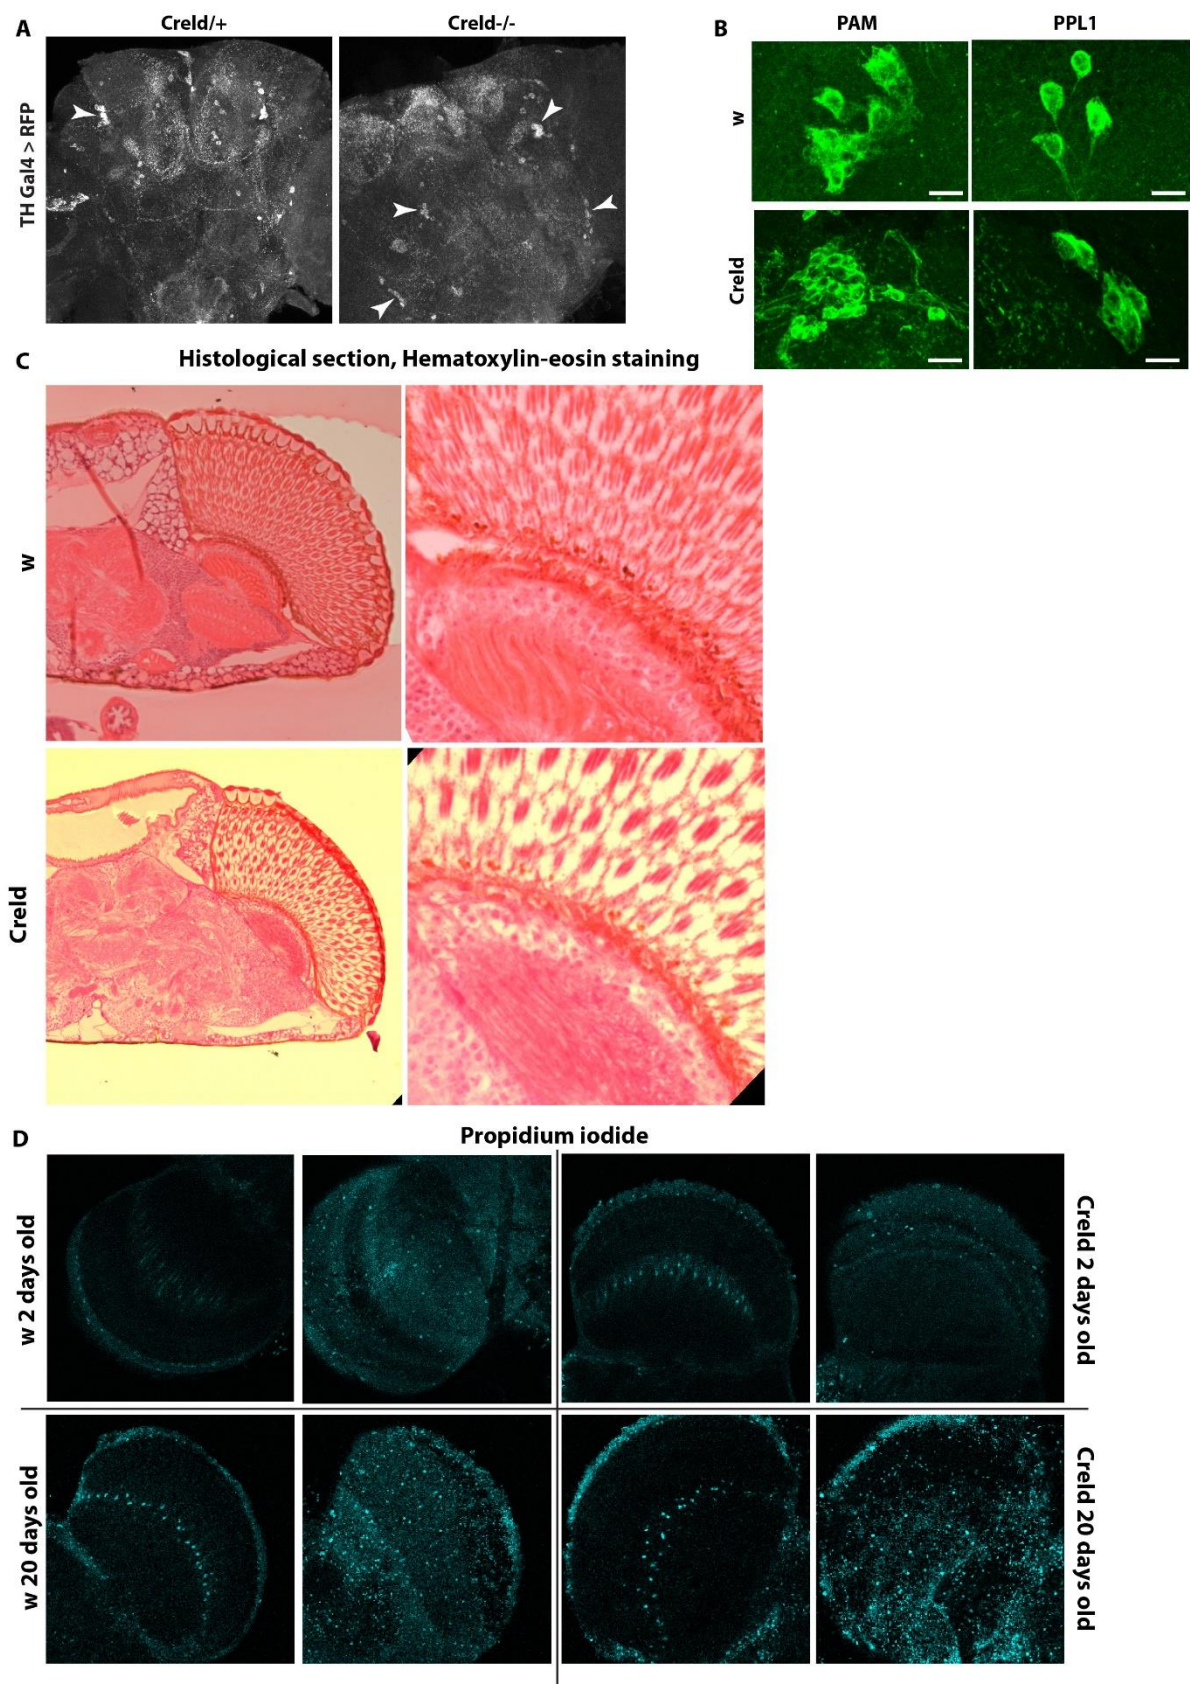

**Figure S4:** A) Immunofluorescent staining of adult brains with RFP under the control of TH-Gal4 to label dopaminergic neurons. B) Selected clusters of dopaminergic neurons stained with  $\alpha$ -TH. C)

Histological sections of adult brains stained with hematoxylin-eosin (HE). D) Staining of apoptotic cells in optical lobes of young and old w and Creld adult flies with propidium iodide.

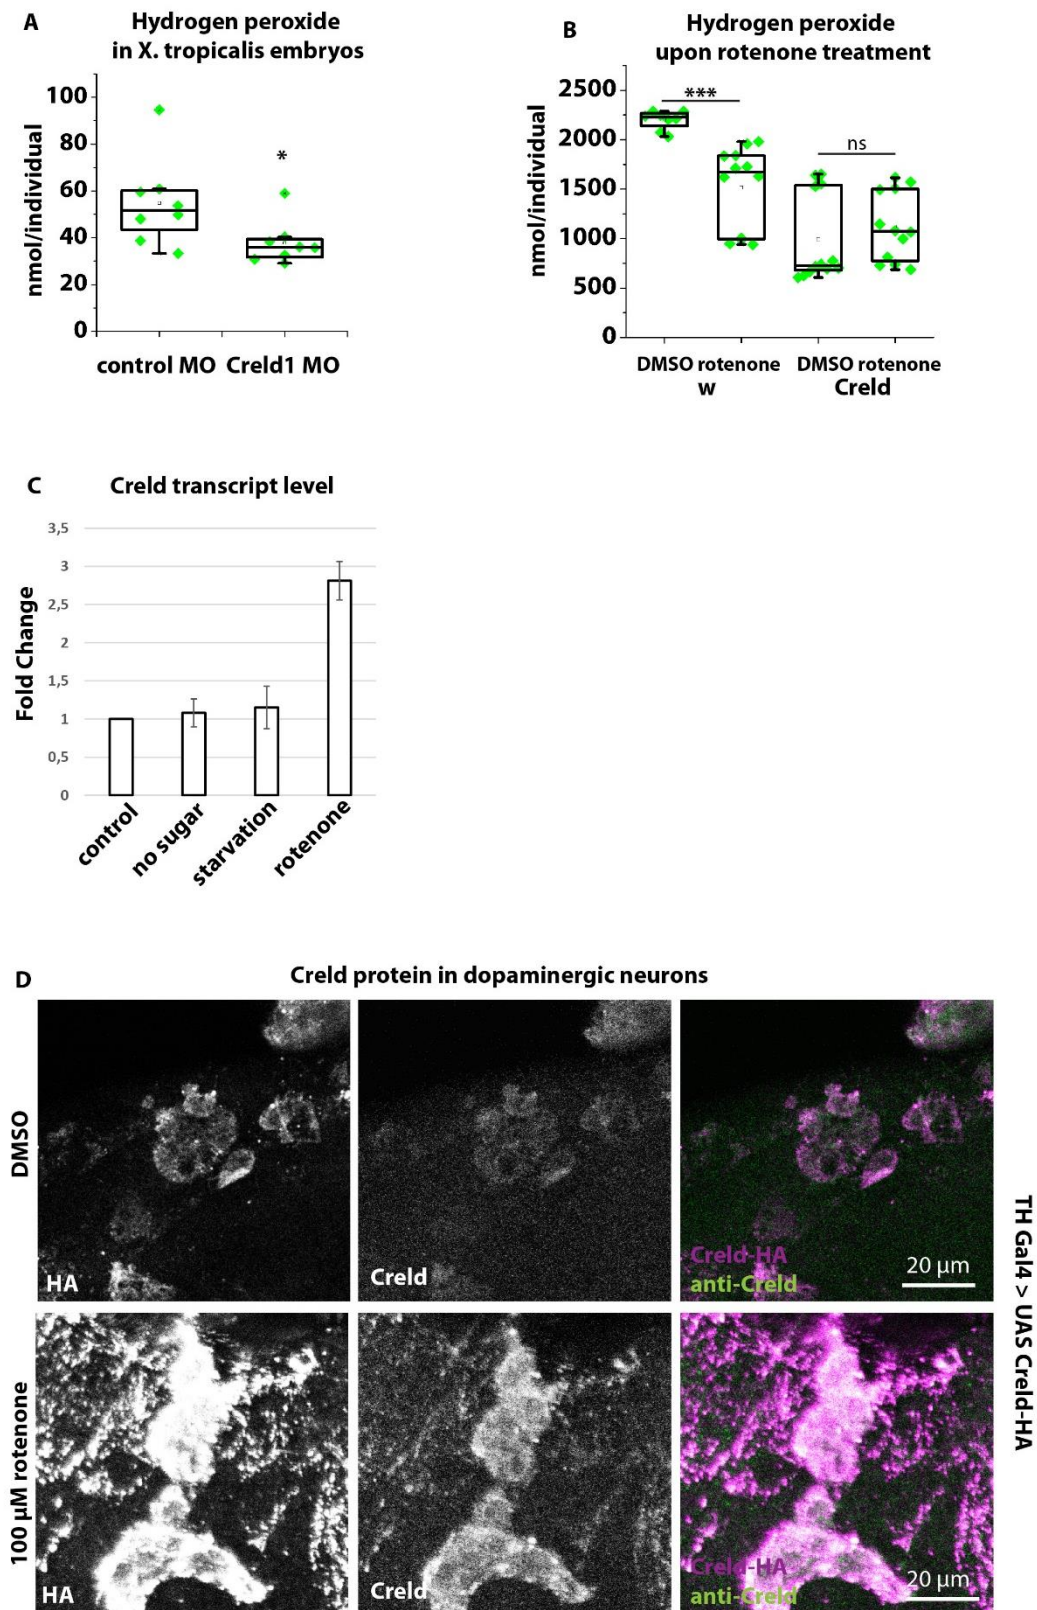

**Figure S5:** A) Hydrogen peroxide in extracts of *X. tropicalis* embryos. B) Hydrogen peroxide levels from extracts from adult flies fed on DMSO or 100  $\mu$ M rotenone. C) Quantitative real-time PCR of Creld in wildtype adult flies. Fold Change normalized to control feeding condition. Error bars

represent standard deviation. D) Immunofluorescent staining of PPL1 cluster of dopaminergic neurons in the adult brain of female flies. Creld is tagged with HA, and endogenous Creld is detected with anti-Creld. Genotype: +/+; TH Gal4/UAS-Creld-HA. Flies were fed for 24 h on 10 % sugar with 100  $\mu$ M rotenone or vehicle (DMSO).
